# Supplementary material for: Development of a Glucose Sensor Based on Glucose Dehydrogenase Using Polydopamine-Functionalized Nanotubes
Source: MDPI journal article supplement (doi:10.3390/membranes11060384), 2021-05-24
Supplement: s1 [file s1]

*Supplementary Material*

# Development of a Glucose Sensor Based on Glucose Dehydrogenase using Polydopamine-Functionalized Nanotubes

Won-Yong Jeon <sup>1</sup>, Hyug-Han Kim <sup>2</sup>, Young-Bong Choi <sup>2,\*</sup>

<sup>1</sup> School of Chemical Engineering and Biomedical Institute for Convergence at SKKU (BICS), Sungkyunkwan University, Suwon, 16419, Republic of Korea; powerwy@skku.edu (W.-Y.J.)

<sup>2</sup> Department of Chemistry, College of Science & Technology, Dankook University, Dandae-ro, Cheonan-si, Chungnam 31116, Republic of Korea; hankim@dankook.ac.kr

\* Correspondence: chem0404@dankook.ac.kr (Y.-B.C.); Tel.: +82-41-550-3437, Fax.: +82-41-559-7860.

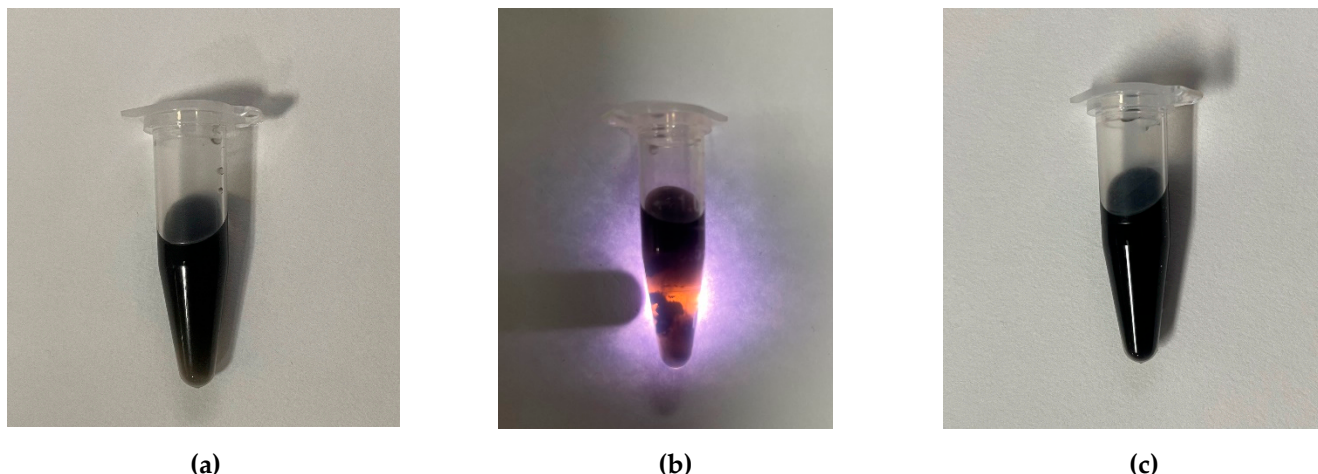

**Figure S1.** Pictures of the (a) dispersed and (b) centrifuged samples, and the (c) supernatant after centrifuging the PDA-MWCNTs.

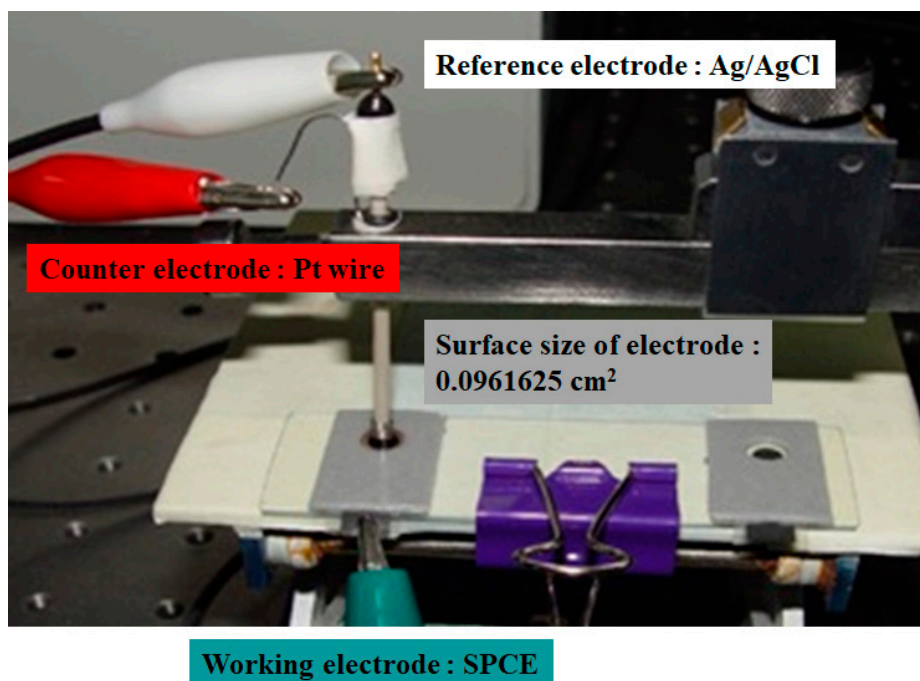

**Figure S2.** Electrochemical system composed of the working, counter, and reference electrodes.

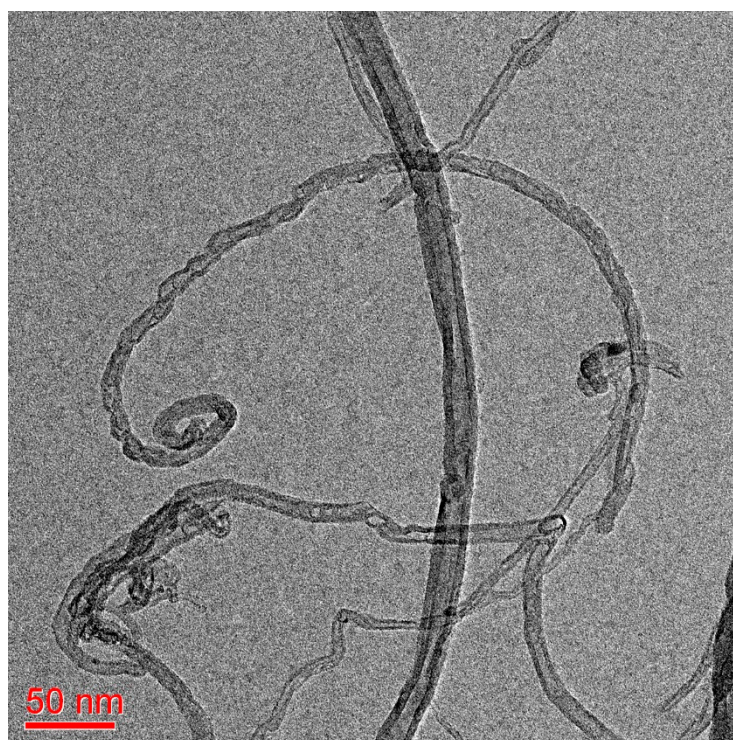

**Figure S3.** TEM image of MWCNTs used in this study.
